# Supplementary material for: Chronic intake of high dietary sucrose induces sexually dimorphic metabolic adaptations in mouse liver and adipose tissue
Source: PubMed Central journal article supplement (PMC9561177; doi:10.1038/s41467-022-33840-6), 2022-10-13
Supplement: 41467_2022_33840_MOESM2_ESM.pdf [file 41467_2022_33840_MOESM2_ESM.pdf]

## **Description of Additional Supplementary Files**

File Name: Supplementary Data 1

Description: Primer Sequences

File Name: Supplementary Data 2

Description: Differential Gene Expression (adipose tissue)

File Name: Supplementary Data 3

Description: String Network Analysis (adipose tissue)

File Name: Supplementary Data 4

Description: Gene Set Enrichment Analysis (adipose tissue)

File Name: Supplementary Data 5

Description: DESeq results (microbiome)
